# Supplementary material
Source: PubMed Central journal article supplement (PMC5021378)

**A**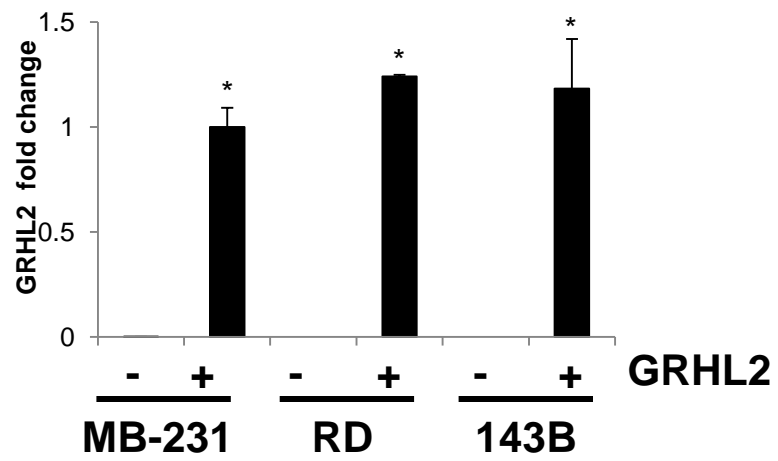**B**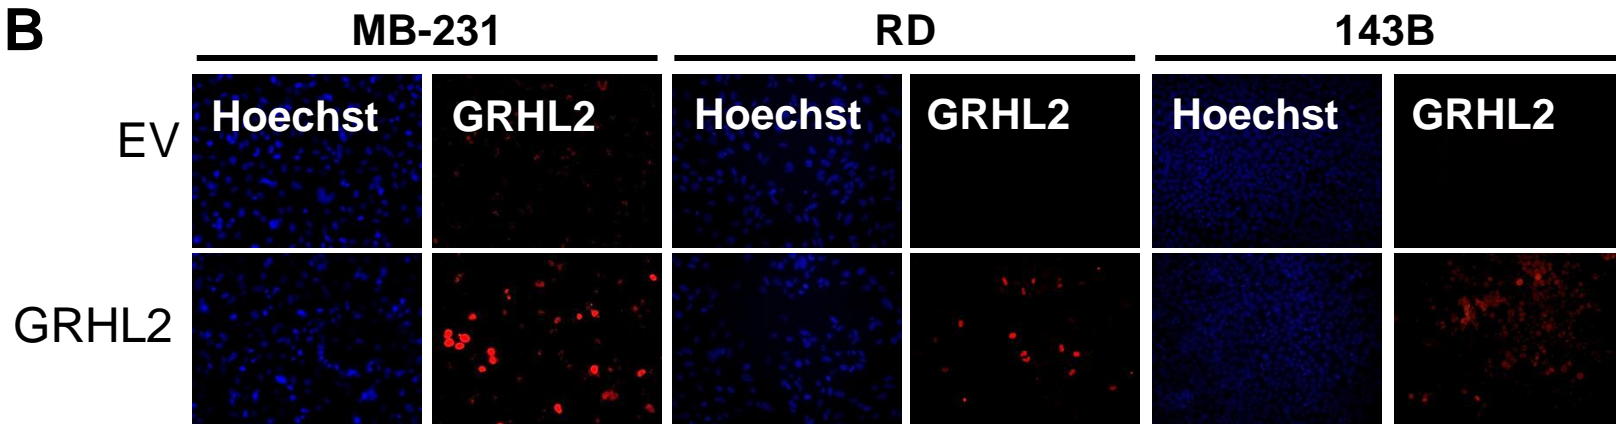

**A**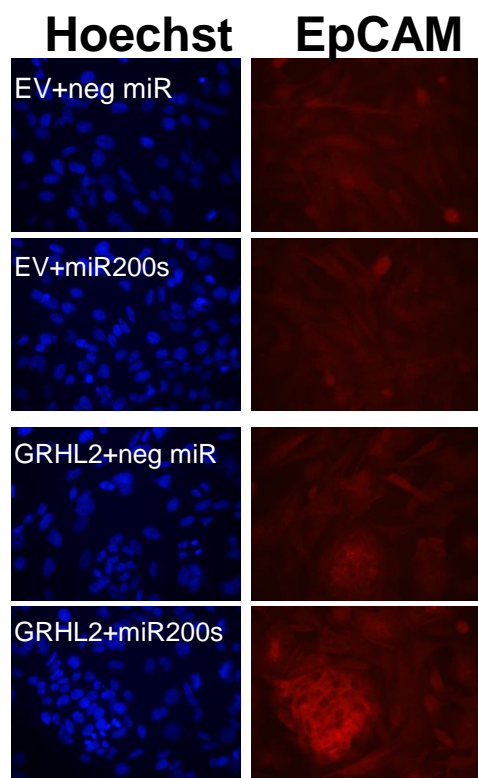**B**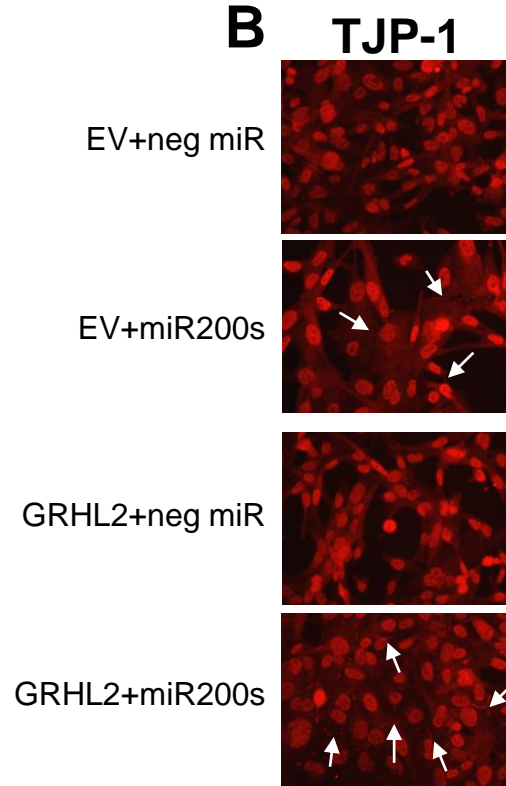

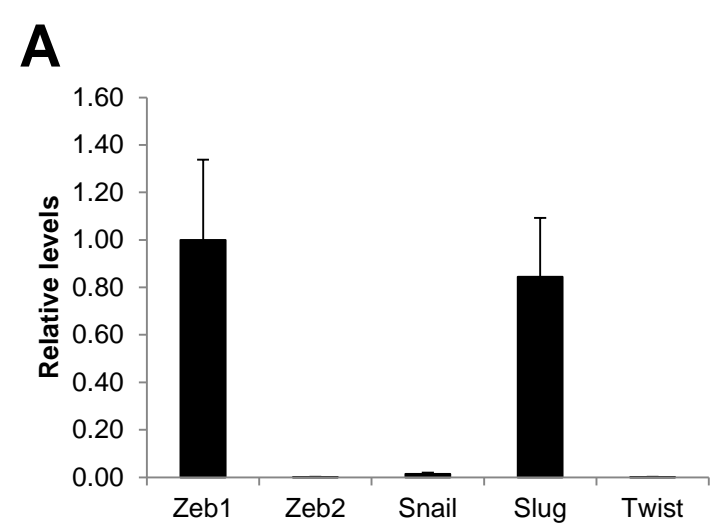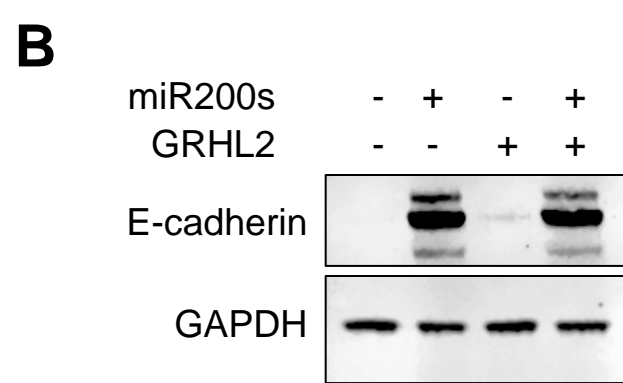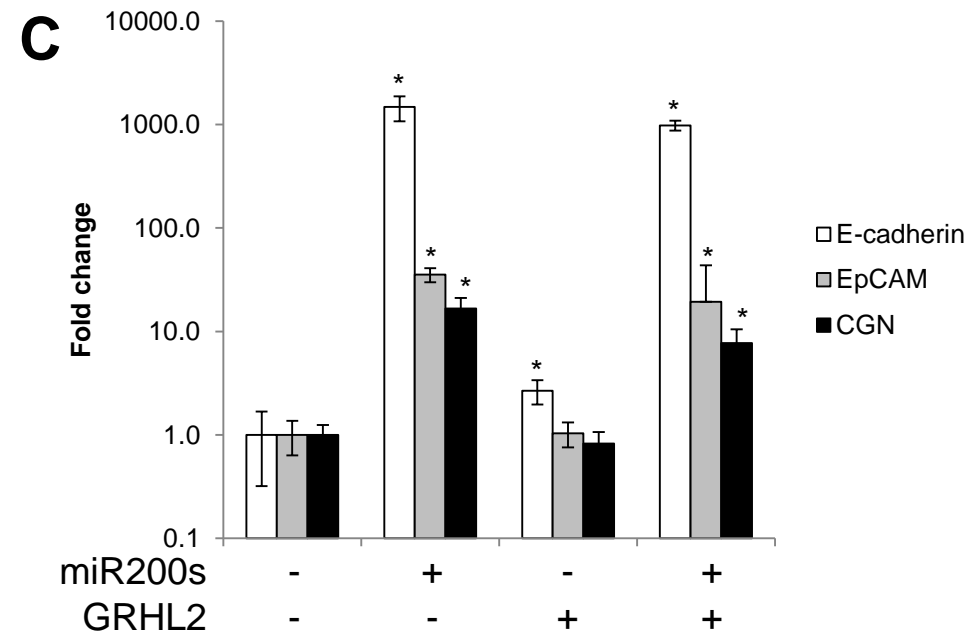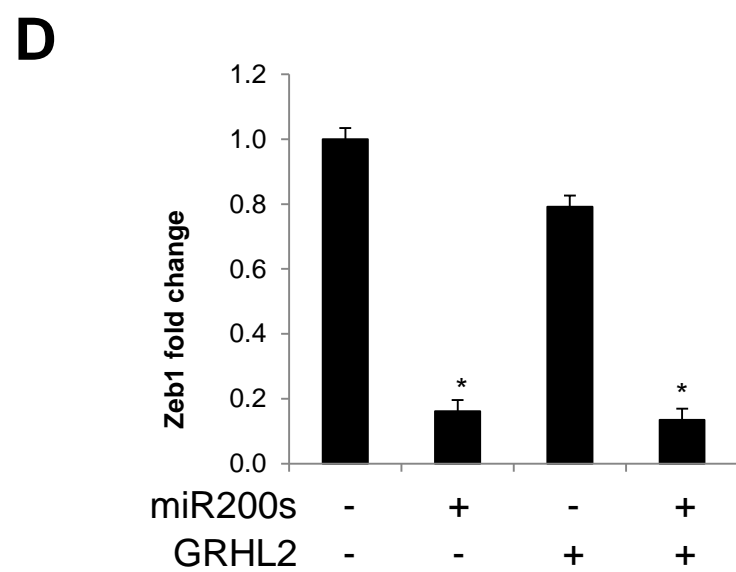

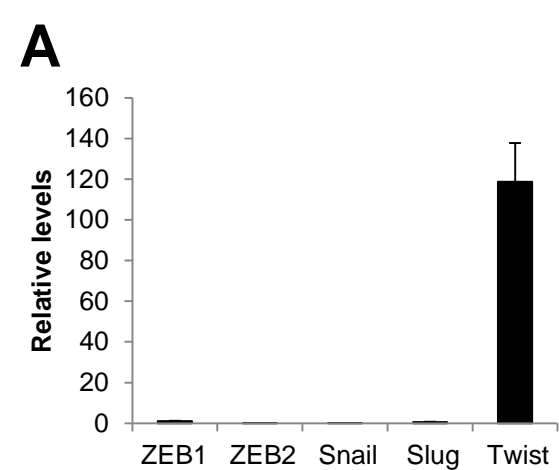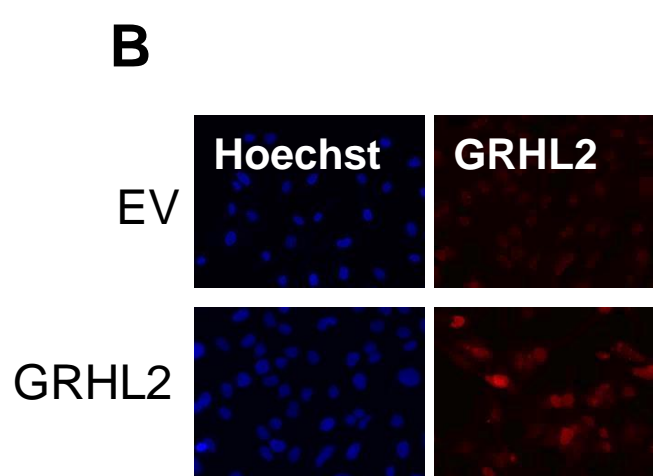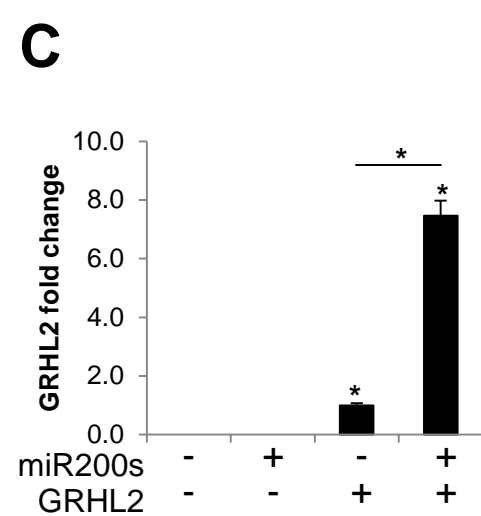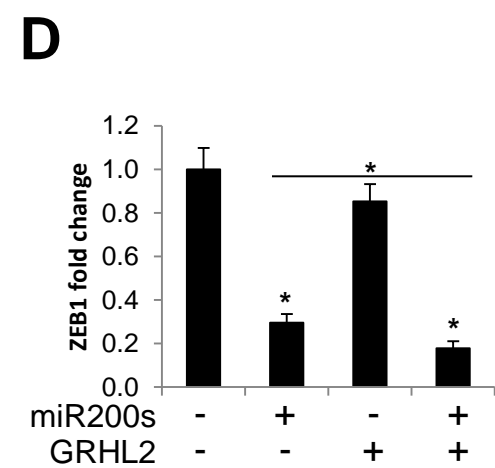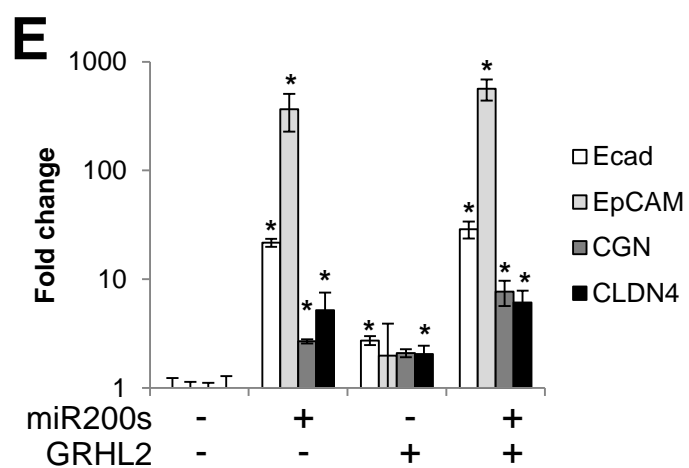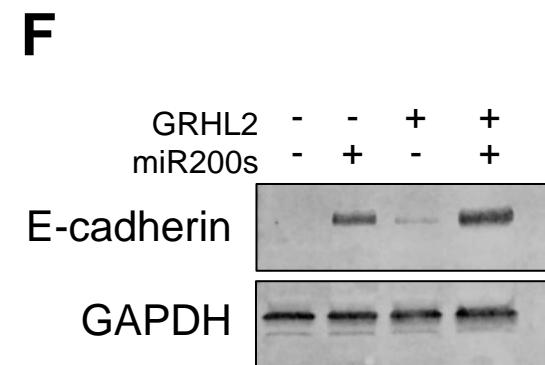

**A**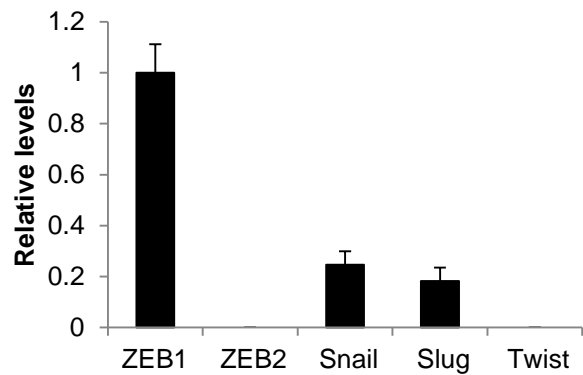**B**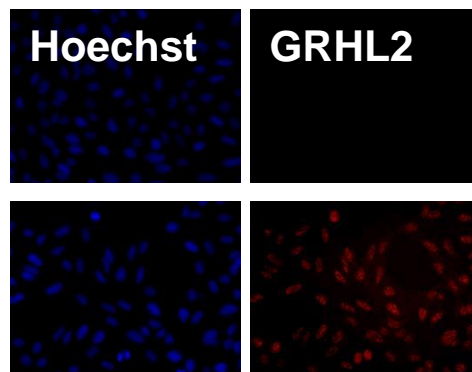**C**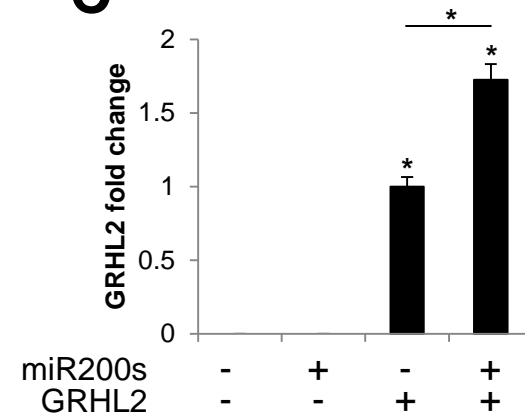**D**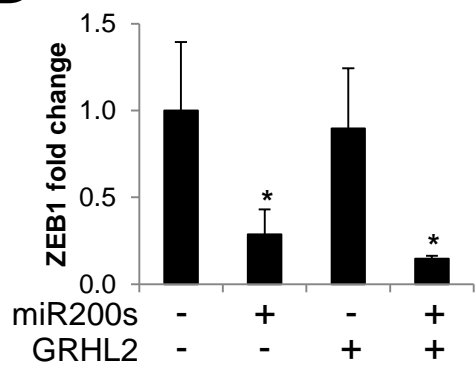**E**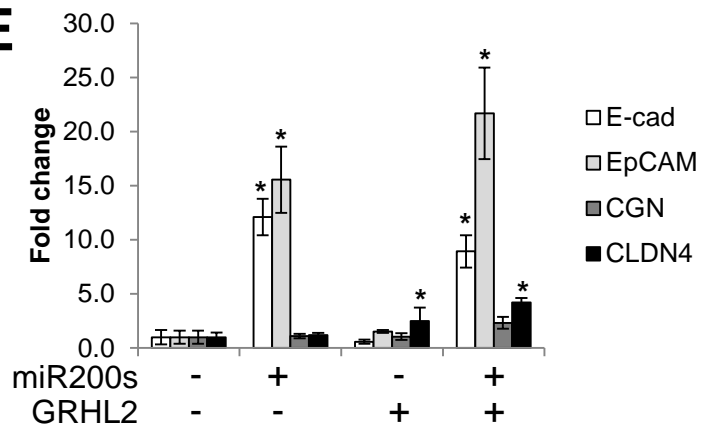

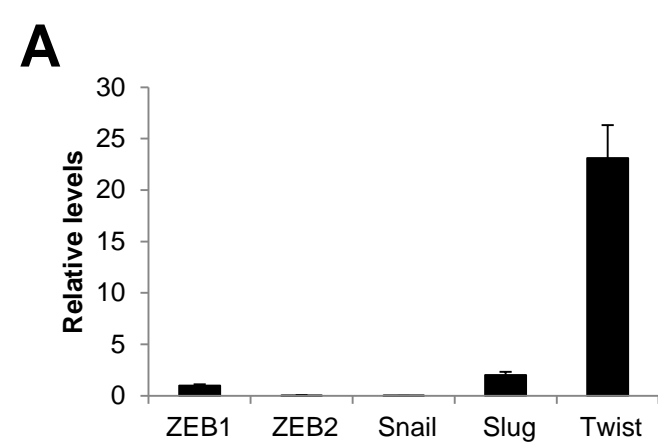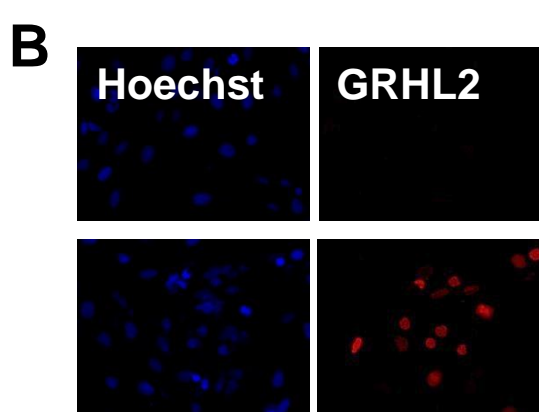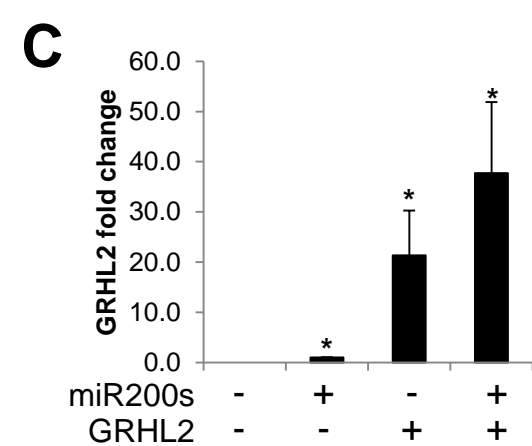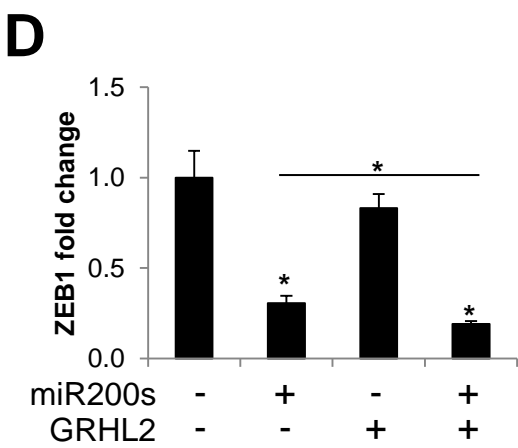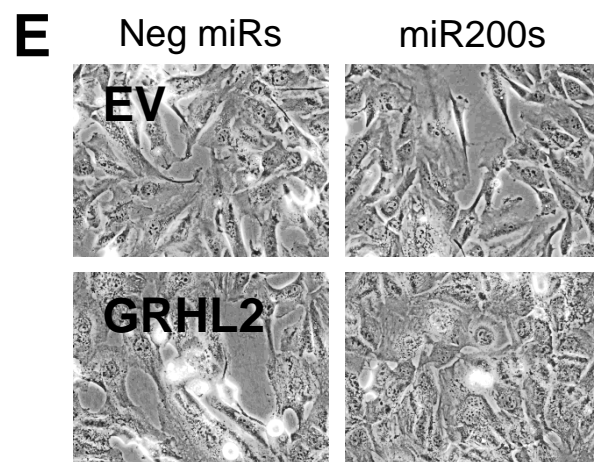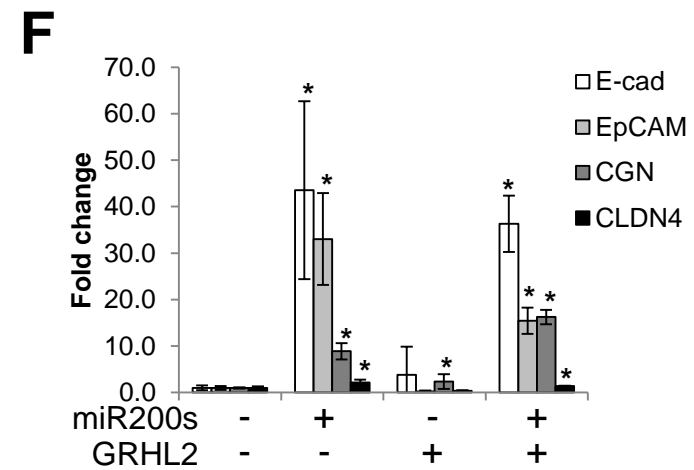

**A**

Sarcoma

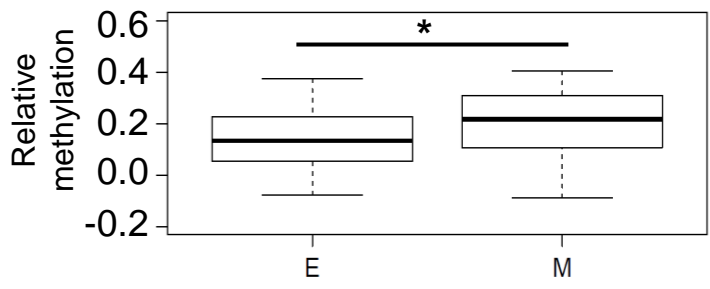

CRC

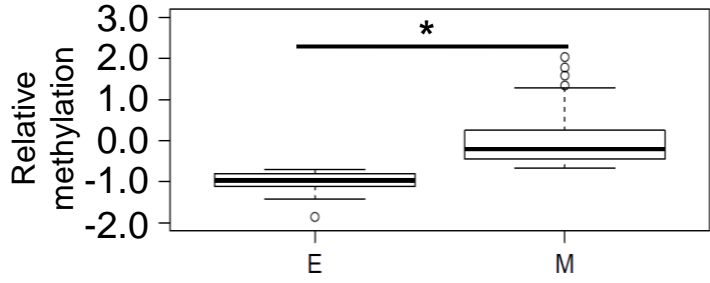

Breast

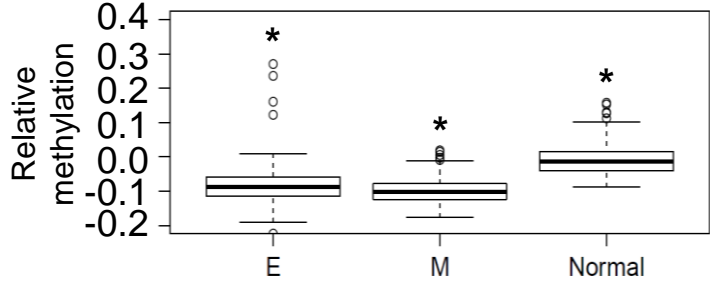

Prostate

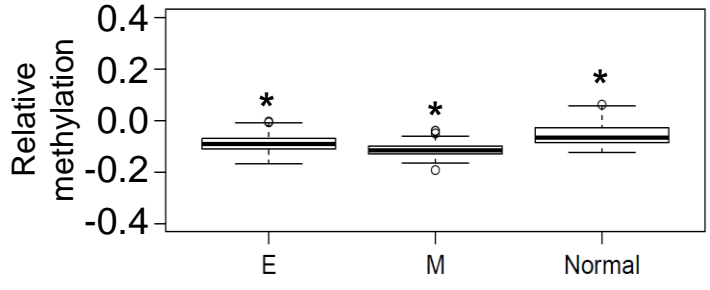

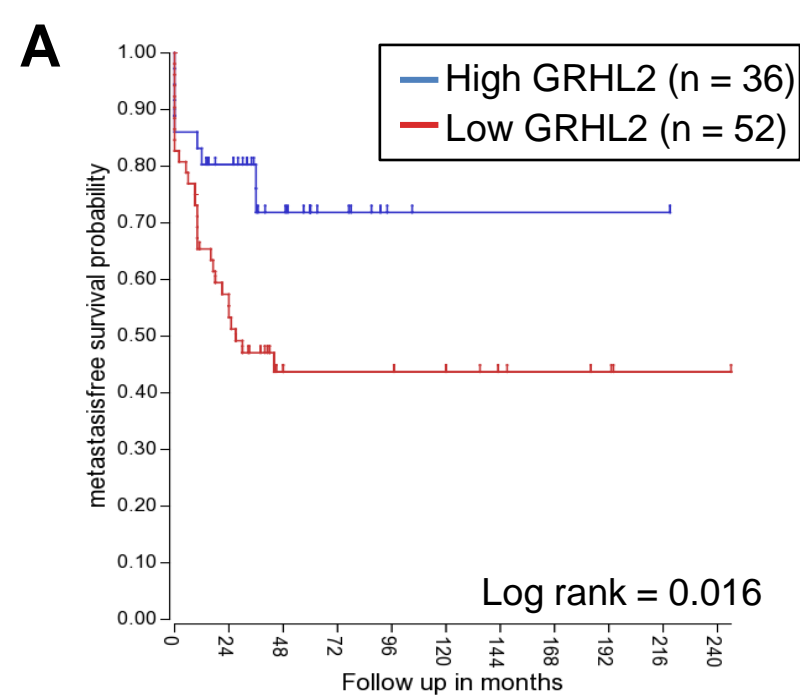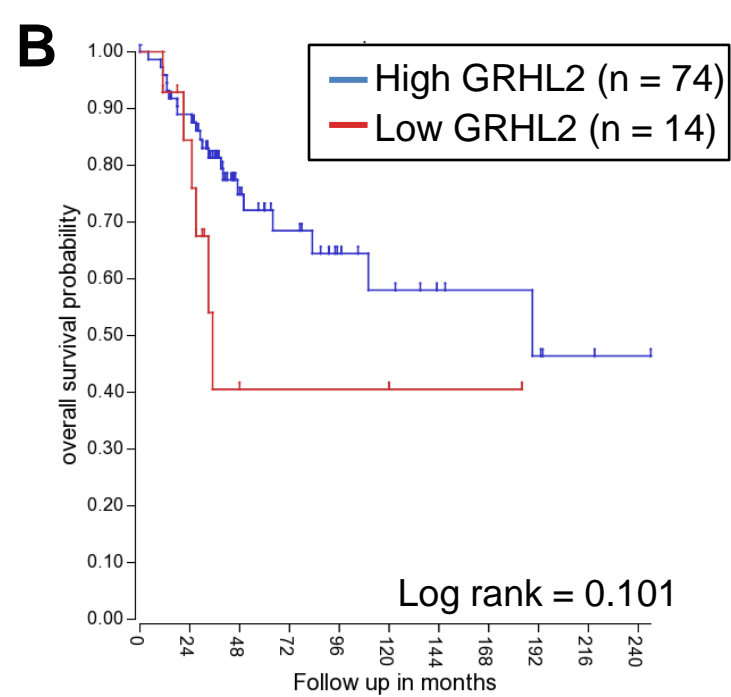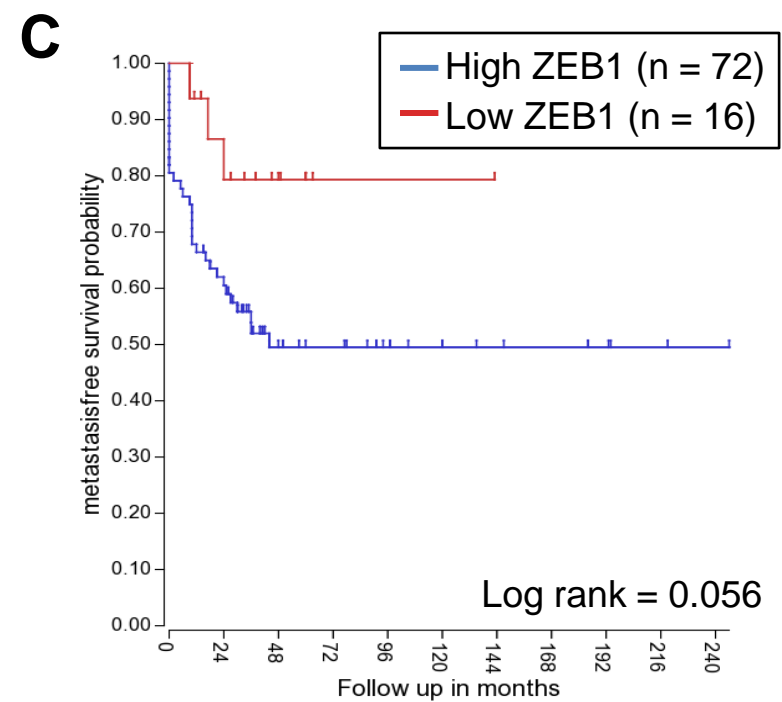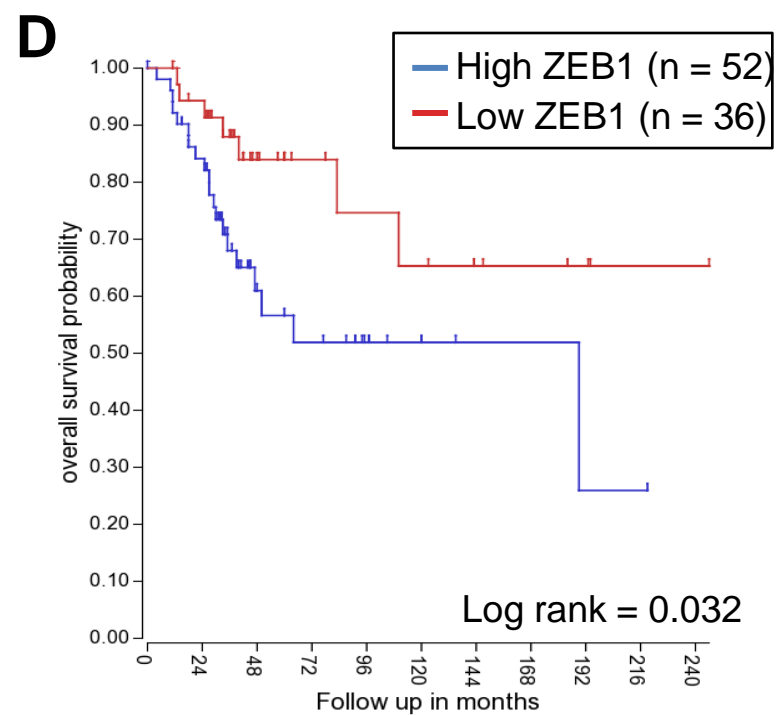



**A** Sarcoma RNA-Seq

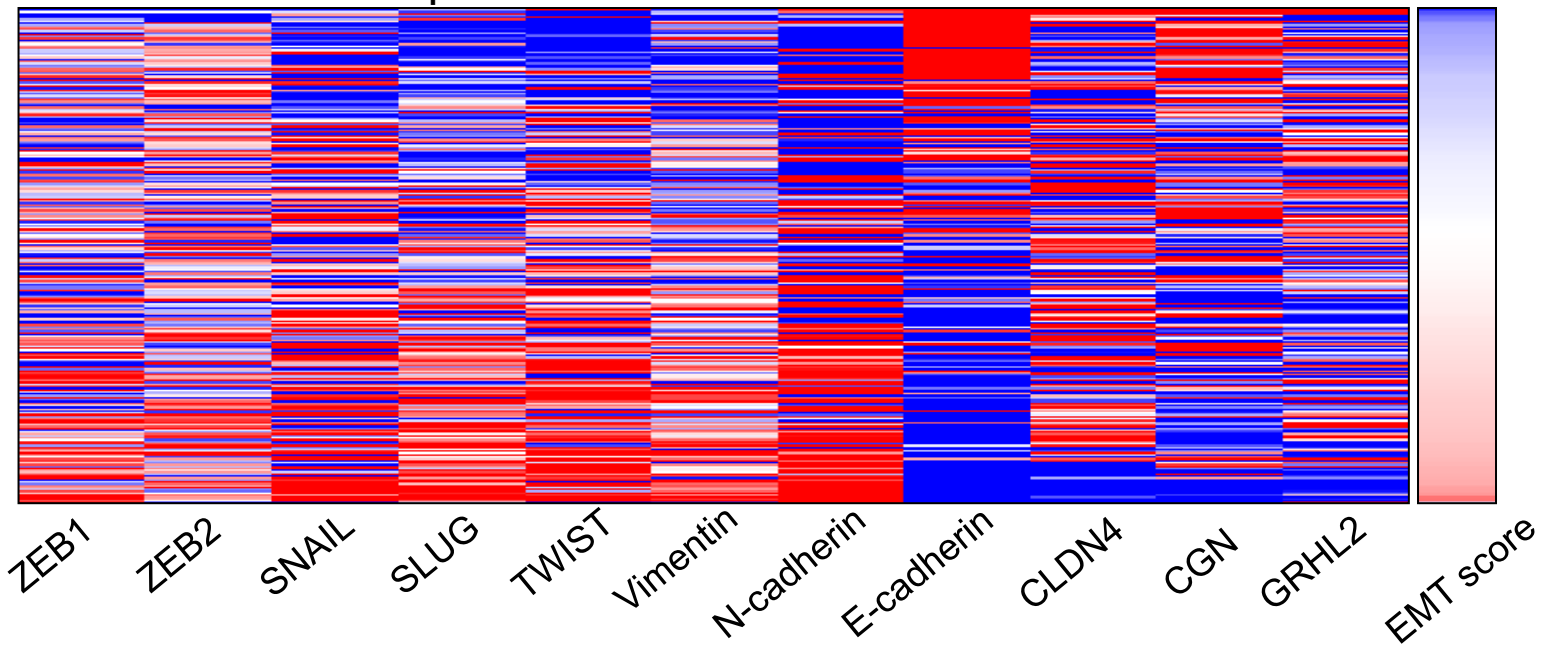

**B** Sarcoma RNA-Seq (PANCAN Normalized)

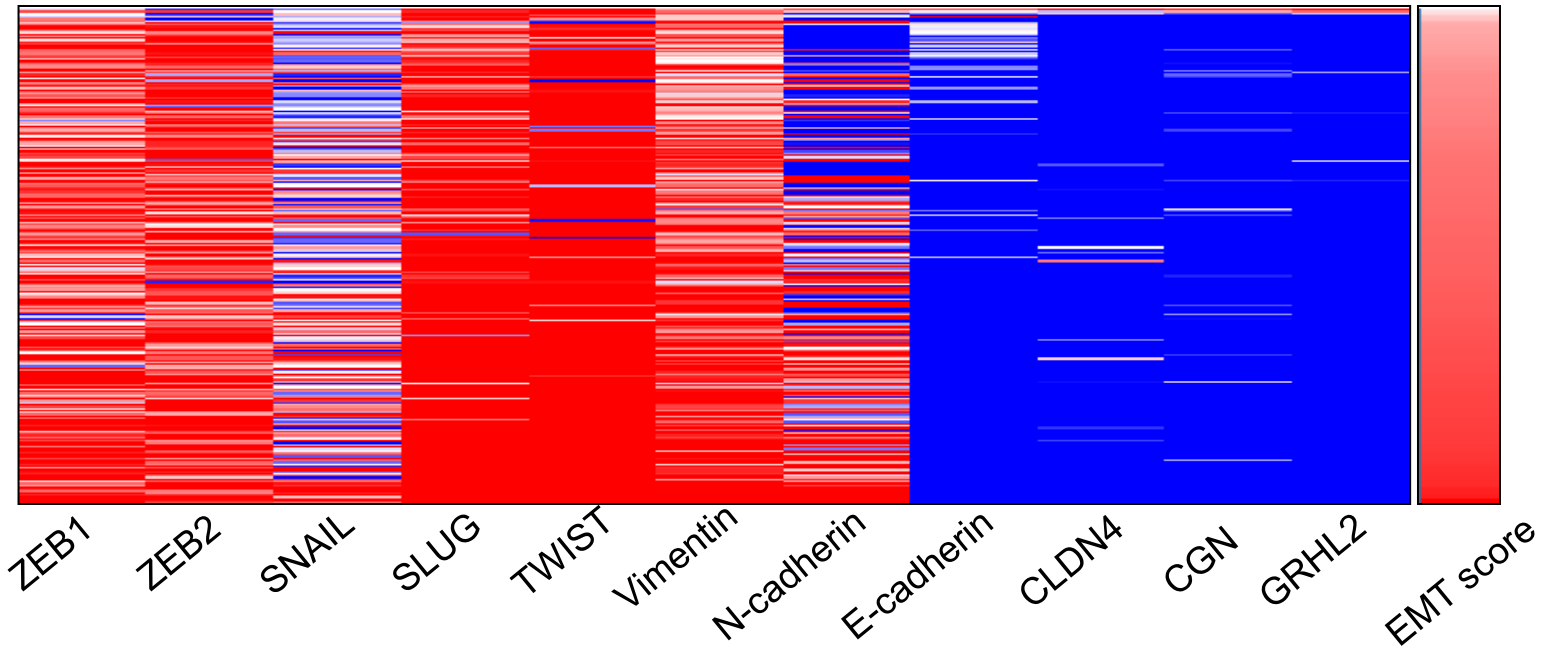

Supplement: MCB.00373-16_zmb999101315so1.pdf [file MCB.00373-16_zmb999101315so1.pdf]
